# Supplementary material
Source: PubMed Central journal article supplement (PMC3787946)
Supplement: NIHMS498765-supplement-01.pdf [file NIHMS498765-supplement-01.pdf]

Supplementary Table 1

Associations of sample source, and interval between sample collection and processing with key parameters of standard and microfilter-based urine cytology.

|                                         | <i>n</i> | Sample source                       |                                     | <i>P</i> | Interval between sample collection and processing |                                  |          |
|-----------------------------------------|----------|-------------------------------------|-------------------------------------|----------|---------------------------------------------------|----------------------------------|----------|
|                                         |          | Voided urine<br><i>n</i> (column %) | Bladder wash<br><i>n</i> (column %) |          | ≤24 hours<br><i>n</i> (column %)                  | >24 hours<br><i>n</i> (column %) | <i>P</i> |
| All samples                             | 54       | 16 (100)                            | 38 (100)                            |          | 25 (100)                                          | 29 (100)                         |          |
| Diagnostic call – standard cytology     |          |                                     |                                     | 1.00     |                                                   |                                  | 0.21     |
| Negative <sup>a</sup>                   | 41       | 12 (75.0)                           | 29 (76.3)                           |          | 17 (68.0)                                         | 24 (82.8)                        |          |
| Positive                                | 13       | 6 (25.0)                            | 9 (23.7)                            |          | 8 (32.0)                                          | 5 (17.2)                         |          |
| Diagnostic call – microfilter cytology  |          |                                     |                                     | 0.19     |                                                   |                                  | 0.72     |
| Negative                                | 38       | 9 (56.3)                            | 29 (76.3)                           |          | 17 (68.0)                                         | 21 (72.4)                        |          |
| Positive                                | 16       | 7 (43.8)                            | 9 (23.7)                            |          | 8 (32.0)                                          | 8 (27.6)                         |          |
| Background cells – standard cytology    |          |                                     |                                     | 0.72     |                                                   |                                  | 0.77     |
| None                                    | 7        | 2 (12.5)                            | 5 (13.2)                            |          | 3 (12.0)                                          | 4 (13.8)                         |          |
| Present, no effect on evaluation        | 25       | 8 (50.0)                            | 17 (44.7)                           |          | 13 (52.0)                                         | 12 (41.4)                        |          |
| Present, moderately limits evaluation   | 18       | 4 (25.0)                            | 14 (36.8)                           |          | 8 (32.0)                                          | 10 (34.5)                        |          |
| Present, severely limits evaluation     | 4        | 2 (12.5)                            | 2 (5.3)                             |          | 1 (4.0)                                           | 3 (10.3)                         |          |
| Background cells – microfilter cytology |          |                                     |                                     | 0.46     |                                                   |                                  | 0.54     |
| None                                    | 27       | 7 (43.8)                            | 20 (52.7)                           |          | 14 (56.0)                                         | 13 (44.8)                        |          |
| Present, no effect on evaluation        | 23       | 7 (43.8)                            | 16 (42.1)                           |          | 9 (36.0)                                          | 14 (48.3)                        |          |
| Present, moderately limits evaluation   | 3        | 2 (12.5)                            | 1 (2.6)                             |          | 1 (4.0)                                           | 2 (6.9)                          |          |
| Present, severely limits evaluation     | 1        | 0 (0.0)                             | 1 (2.6)                             |          | 1 (4.0)                                           | 0 (0.0)                          |          |

*p*-value calculated by Pearson's chi-square test (or Fisher's exact test when any expected cell count <5).

<sup>a</sup> Includes paucicellular samples.
