# Supplementary material
Source: PubMed Central journal article supplement (PMC3787946)
Supplement: NIHMS498765-supplement-02.pdf [file NIHMS498765-supplement-02.pdf]

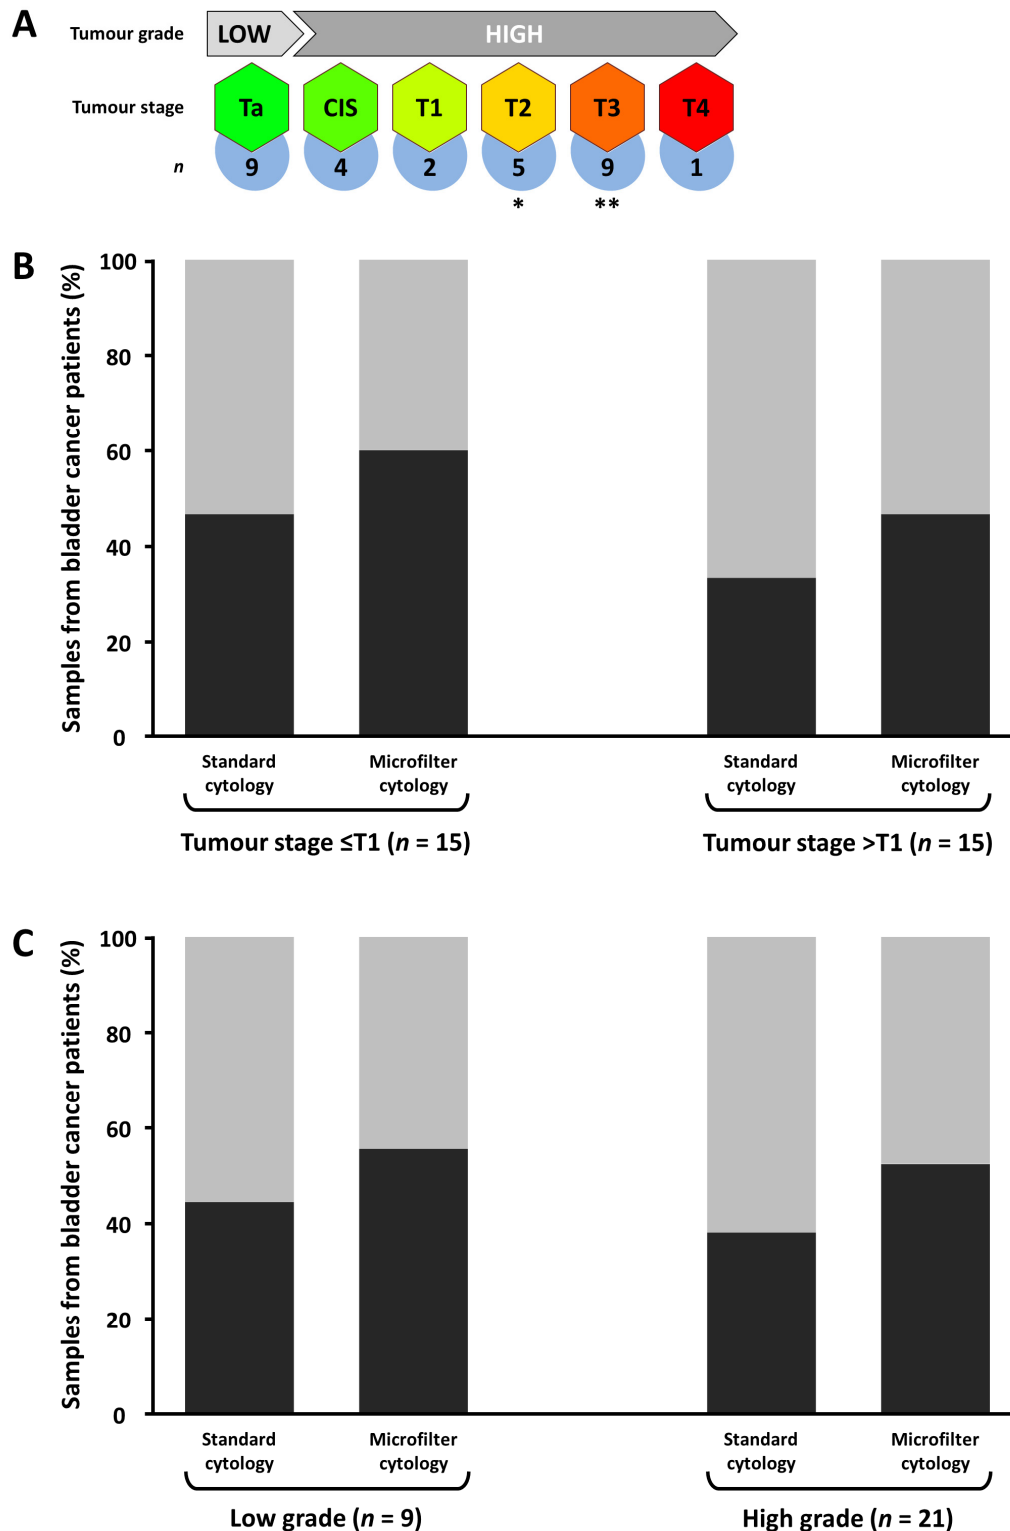

Supplementary Fig. 1. Association of diagnostic calls by standard and microfilter-based urine cytology with tumour stage and grade in samples from patients with bladder cancer. (A) Distribution of tumour grade and stage corresponding to samples from patients with bladder cancer. Asterisks denote number of samples designated as paucicellular by standard cytology. Black and grey bars in the following histograms represent percentages of true-positive and false-negative calls for presence of bladder cancer, respectively. (B) Standard urine cytology detected 46.7% of stage  $\leq T1$  and 33.3% of stage  $>T1$  tumours. The corresponding percentages for microfilter cytology were 60% and 46.7%, respectively. (C) Standard cytology detected 44.4% of low-grade and 38.1% of high-grade tumours. The corresponding percentages for microfilter cytology were 55.6% and 52.4%, respectively.
